# Supplementary material
Source: Springer Nature journal article supplement (https://www.springermedizin.de/resource/supplementary/12936_2014_3638_MOESM1_ESM.pdf/9546184)

**A bottle filled with hot water provides a host cue to attract mosquitoes**

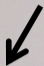

**Treated netting held in place with a PVC ring**

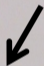

**Mosquitoes introduced here**

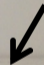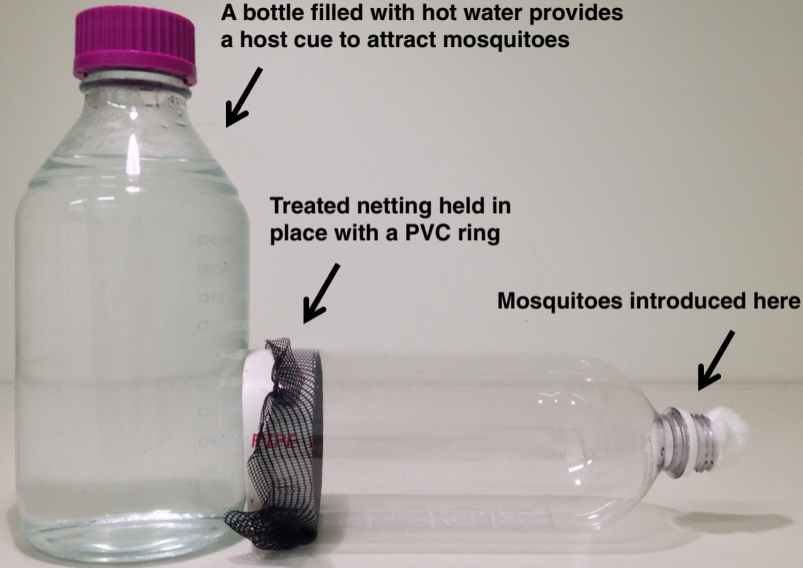

Supplement: MOESM1 [file 9546184]
